## CORRESPONDENCE

able to compensate for the decrease in peripheral resistance by increasing cardiac output by approximately 0.8 l/min. These changes, however, were short-lived, and all hemodynamic parameters returned to baseline within a matter of several minutes.

We also performed radiolabeled microsphere studies and dose-response studies in rabbits,<sup>2</sup> examining hypertonic glucose and hypertonic mannitol. We found that rate and dose were important factors influencing change in systemic vascular resistance and in systemic arterial pressure, *i.e.*, the faster the rate of administration and the greater the osmotic load, the greater the hemodynamic effect. The vascular bed primarily responsive to this hypertonic load was in muscle tissue. One wonders how long the hypotension lasted in the patients studied by Goertz *et al.*, whether this was an effect that was sustained for more than a transient period (as we observed with 25% mannitol), and whether the phenomena might have been caused by vasodilation of the vascular supply to muscle tissue, resulting in a reflex rather than a direct cardiac effect.

**Charles J. Coté, M.D.**  
Professor of Anesthesia and Pediatrics

Anesthesiology  
1996; 84:475  
© 1996 American Society of Anesthesiologists, Inc.  
Lippincott-Raven Publishers

*In Reply:*—As expected, we found a decrease of arterial pressure in response to hypertonic saline/hetastarch that was caused by peripheral vasodilation. However, the primary aim of our study was to evaluate a possible positive inotropic effect of hypertonic saline. With changes in left-sided loading and possibly left ventricular contractility occurring at the same time, end-systolic pressure-volume (length, area, respectively) relationship (ESPVR) had to be used to assess left ventricular contractility. To obtain the ESPVR-curve, arterial pressure maneuvers must be performed (*e.g.*, phenylephrine bolus administration), which in turn interfere with alterations of blood pressure in response to hypertonic saline. Obviously, a comment on the time course of blood pressure changes after that maneuver is not

Anesthesiology  
1996; 84:475-6  
© 1996 American Society of Anesthesiologists, Inc.  
Lippincott-Raven Publishers

## Defective Carbon Dioxide Absorber as a Cause for a Leak in a Breathing Circuit

*To the Editor:*—We would like to bring to attention an unusual cause of a leak in the breathing circuit of a circle anesthesia system involving the carbon dioxide absorber canister (Soda-Sorb NSN 6505-00-782-6484, WR Grace, Lexington, MA).

During a routine preuse machine check, we noted a leak within the breathing system. Visual inspection of the breathing circuit did not reveal the source of the leak, and all joints appeared to be intact.

Northwestern University Medical School  
Vice Chairman  
Director of Research  
Department of Pediatric Anesthesia  
Children's Memorial Hospital  
2300 Childrens Plaza  
Chicago, Illinois 60614

### References

1. Goertz AW, Mehl T, Lindner KH, Rockemann MG, Schirmer U, Schwilk B, Georgieff M: Effect of 7.2% hypertonic saline/6% hetastarch on left ventricular contractility in anesthetized humans. *ANESTHESIOLOGY* 1995; 82:1389-95
2. Coté CJ, Greenhow DE, Marshall BE: The hypotensive response to rapid intravenous administration of hypertonic solutions in man and in the rabbit. *ANESTHESIOLOGY* 1979; 50:30-5

(Accepted for publication October 27, 1995.)

possible. Furthermore, because we did not use different rates of administration or doses of hypertonic saline, we are not able to comment on the interesting questions addressed by Coté concerning the influence of both variables on the degree of hemodynamic changes.

**Axel W. Goertz, M.D.**  
Department of Anesthesiology  
University of Ulm  
Prittowitzstrasse 43  
89075 Ulm, Germany

(Accepted for publication October 27, 1995.)

## CORRESPONDENCE

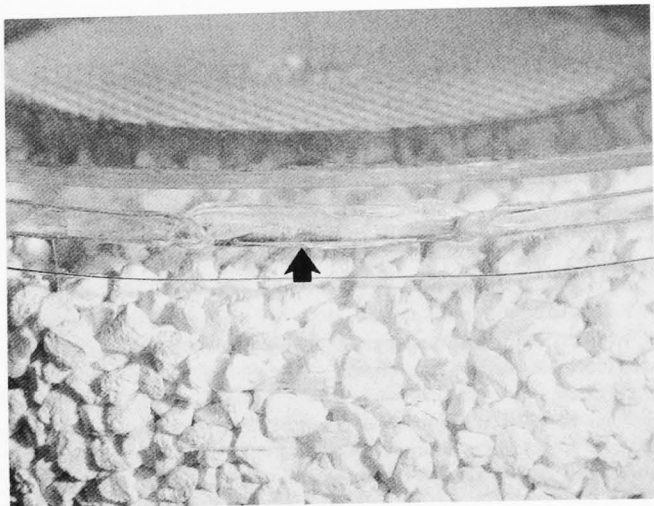

Fig. 1. Arrow showing gap between lid and canister.

Anesthesiology  
1996; 84:476-7  
© 1996 American Society of Anesthesiologists, Inc.  
Lippincott-Raven Publishers

granules and covered with a perforated lid, which is then heat-sealed to the top edge of the cylinder. This canister was defective because the edge of the lid had not been properly sealed with the canister before heat-sealing. The height of a correctly sealed canister is 89 mm; our canister edge was 94 mm, leaving a 5-mm increase in canister height (fig. 1). This resulted in a gap between the lid and the side wall of the canister, which allowed gases to escape from the breathing circuit. The problem was easily solved by replacing the canister. However, this case reiterates the need to conduct a thorough pre-use check of the anesthesia machine.

A. M. Kshatri, M.D.  
Resident of Anesthesia  
C. P. Kingsley, M.D.  
Associate Professor Anesthesia  
Department of Anesthesia  
Pennsylvania State University  
P.O. Box 850  
Hershey, Pennsylvania 17033

(Accepted for publication October 27, 1995.)

## Intraoperative Latex Anaphylaxis Observed in a Farmer

*To the Editor:*—Contact urticaria to natural latex and its products, such as rubber gloves, balloons, and condoms, is a well known allergy type (type IV). Furthermore, latex hypersensitivity was recently recognized as one of the major IgE mediated intraoperative anaphylaxis (type I).<sup>1</sup> The risk group for latex hypersensitivity includes health-care workers, hospital employees, people wearing household rubber gloves, atopic persons, rubber industry workers, and patients, especially children who have multiple surgeries and catheterizations with latex catheters.<sup>2,3</sup>

We encountered an intraoperative latex anaphylaxis in a patient from the eastern part of Turkey who is an practicing farmer in his own land. This 55-yr-old male patient had undergone a lower lip epidermoid Ca operation. It was noted that the patient was undergoing a surgery for the first time in his life. Meperidine (60 mg) was used for sedation, and induction of anesthesia was achieved using 3 µg/kg fentanyl, 5 mg/kg thiopental, and 0.1 mg/kg vecuronium followed by intubation. Anesthesia was maintained by oxygen/nitrous oxide and 1% enflurane. Forty-five minutes after the start of surgery, blood pressure decreased from 110/80 to 60/30 mmHg, and pulse increased from 80 to 110 beats/min. Extensive urticaria had developed on the skin, and severe bronchospasm was heard. Oxyhemoglobin saturation decreased to 85%. All the anesthetic agents were discontinued, and the lungs were ventilated with 100% O<sub>2</sub>. Despite rapid intravascular administration of crystalloid and colloid solutions, blood pressure decreased to 30/0 mmHg. Ten- and 20-µg doses of intravenous epinephrine were given, and 250 mg methyl prednisolone

was administered; blood pressure increased to 60/30 mmHg. An epinephrine infusion at a dosage of 0.05 µg · kg<sup>-1</sup> · min<sup>-1</sup> was started. It took about 15 min to stabilize the patient. Anesthesia was maintained with a low-dosage fentanyl infusion, nitrous oxide/oxygen, and the operation was completed within 20 min. Because the patient was not considered to be in the risk group, latex anaphylaxis was not suspected during the operation. An intravenous infusion of epinephrine was discontinued after the patient was taken to the postoperative intensive care unit, and the trachea was extubated uneventfully. Six weeks after discharge, skin test results with fentanyl, thiopental, and vecuronium were negative. Further history revealed that, in his daily farming activities, the patient often used latex gloves that were causing urticaria in his hands and arms. Results of analysis for specific IgE to latex using RAST method are shown in table 1. Scratch test was performed on the patient using his own rubber gloves, and the result was positive.<sup>4,5</sup>

Even though latex anaphylaxis generally is observed among certain risk groups (medical personnel, rubber industry workers), our case

Table 1. Immunoglobulin E Concentrations

| Immunoglobulin E             | Normal        | Patient              |
|------------------------------|---------------|----------------------|
| Total                        | 14–240 µg/lit | 310 µg/lit           |
| Latex-specific (RAST method) | <0.3 PRU/ml   | 2.8 PRU/ml (class 2) |

shows that the risk group of latex products.

Anesthesiology  
1996; 84:477  
© 1996 American Society of Anesthesiologists, Inc.  
Lippincott-Raven Publishers

*To the Editor:*—The blocker Univent tube ( advantages over double-lumen of aspiration prevention change, selective block (especially in an emergent situation). It is occasionally necessary in patients who have a difficult airway, even in the patient who underwent a tracheotomy. The patient was a 77-year-old male with a progressive large lesion recurrent malignant melanoma showed a left-sided pulmonary progressive growth of the tumor. It was decided to proceed with the current surgery, the left submandibular gland, left lateral temporal bone, and left pectoralis major muscle. In the postoperative therapy. He was scheduled for a sulin-dependent diabetes mellitus. His medical history revealed a diameter of 5 mm. Because of different options to achieve a reasonably sized
